# 1 **Silencing of lncRNA NEAT1 inhibits esophageal squamous cell** 2 **carcinoma proliferation, migration, and invasion via regulation** 3 **of the miR-1299/MMP2 axis**

4 Zhanfeng Yang<sup>1</sup>, Meilin Zhu<sup>2</sup>, Jingjing Zhang<sup>1</sup>, Guangchong Zhang<sup>3</sup>, Jun Hu<sup>2</sup>, Qunli He<sup>1,\*</sup>

5 <sup>1</sup>Department of Medicine, Zhengzhou University of Industrial Technology, Xinzheng, Henan, China;

6 <sup>2</sup>School of Basic Medical Sciences, Zhengzhou University, Zhengzhou, Henan, China;<sup>3</sup>Henan Medical  
7 College, Zhengzhou, Henan, China

8 \*Correspondence: hequnli551212@126.com

## 9 **Abstract:**

10 Esophageal squamous cell carcinoma (ESCC) is the most prevalent form of esophageal cancer worldwide.  
11 Considerable evidence has verified that abnormal expression of lncRNAs can effectively influence the  
12 progression of various malignant tumors. However, the regulatory mechanisms of lncRNAs underlying  
13 ESCC development and progression remain poorly defined. Here, we investigated the role of lncRNA  
14 nuclear-enriched abundant transcript 1 (NEAT1) in ESCC via regulating microRNA 1299 (miR-1299) and  
15 matrix metalloproteinase 2 (MMP2). A total of 32 ESCC tissue samples were obtained from the First  
16 Affiliated Hospital of Zhengzhou University. The mRNA levels of lncRNA NEAT1, miR-1299, and  
17 MMP2 mRNA were measured via quantitative real-time PCR. Interactions among miR-1299, lncRNA  
18 NEAT1, and MMP2 mRNA in EC9706 cells were confirmed by dual-luciferase reporter assays and RNA  
19 immunoprecipitation (RIP) assays. The proliferation and migration/invasion of ESCC cells were verified by  
20 CCK-8 and transwell assays, respectively. lncRNA NEAT1 was up-regulated in ESCC tissues and cells.  
21 lncRNA NEAT1 silencing inhibited migration, invasion, and proliferation of ESCC cells. Furthermore,  
22 lncRNA NEAT1 sponged and negatively regulated miR-1299, thus giving rise to increased expression of  
23 MMP2. Moreover, miR-1299 inhibitors and MMP2 rescued the invasion of ESCC cells following silencing  
24 of lncRNA NEAT1. lncRNA NEAT1 was overexpressed in ESCC tissues and cells. Silencing of lncRNA  
25 NEAT1 inhibited ESCC proliferation, migration, and invasion via reducing competitive binding of lncRNA

26 NEAT1 with miR-1299 and enhancing miR-1299-targeted suppression of MMP2. Taken together, our  
27 findings suggest that lncRNA NEAT1 is a potential target for ESCC therapy and rehabilitation.

28 **Keywords:** lncRNA NEAT1; Esophageal squamous cell carcinoma; MiR-1299; CeRNA; MMP2

29 Esophageal squamous cell carcinoma (ESCC) is the most prevalent form of esophageal cancer worldwide  
30 and exhibits a high incidence rate and fatality rate worldwide, especially in East Asia, East Africa, South  
31 Africa, and Southern Europe[1, 2]. Clinically, despite enormous advances having been made in  
32 preoperative radiotherapy, chemotherapy, and surgery in the past several years, the chance of survival for  
33 ESCC patients has been improved but the five-year survival rate has remained at only 15%–20%, with a  
34 median survival time of approximately 1.5 years[3]. Moreover, because the early symptoms are not  
35 obvious, the overwhelming majority of ESCC patients are diagnosed at an advanced stage when tumors  
36 cannot be thoroughly surgically removed[4]. Poor prognosis is a direct result of neoplasm metastasis,  
37 radiotherapy resistance, and the high recurrence rate of ESCC.[5] Thus, identifying more exploitable  
38 molecular markers for early and metaphase diagnosis, as well as elucidating underlying regulatory  
39 mechanisms of ESCC, are urgently needed for ESCC patients to improve prognosis and survival.

40 Long non-coding RNAs (lncRNAs), each of which are over 200 nt in length, are transcribed by RNA  
41 polymerase and are produced by splicing and modification of small nuclear or mature RNAs, but do not  
42 have any capacity for encoding proteins[6]. Previous evidence has indicated that lncRNAs may regulate  
43 numerous biological processes such as tumor growth and metastasis, including those involved in ESCC[7].  
44 Moreover, lncRNAs play roles as signals, scaffolds, guides, decoys, and competing endogenous RNAs  
45 (ceRNAs) through interacting with their corresponding target genes[8]. In various cancers, many lncRNAs  
46 have been discovered to exhibit abnormal expression levels and to be closely related to tumor progression.  
47 For instance, lncRNA ZFAS1 is up-regulated in ESCC and promotes cell proliferation, migration, and  
48 invasion in ESCC cell lines by downregulating miR-124 and upregulating STAT3[9]. lncRNA KLF3-AS1  
49 is down-regulated in ESCC and inhibits tumor growth and invasion via weakening miR-185-5p-mediated  
50 inhibition of KLF3[10]. lncRNA PANDA is upregulated in ESCC and drifts away from NF-YA to promote  
51 the expression of NF-YA-E2F1 co-regulated proliferation-promoting genes, as well as to restrict  
52 apoptosis[11]. lncRNA HAGLR is highly expressed in esophagus cancer (EC) , and HAGLR depletion  
53 leads to cell proliferation, metastasis, invasion, and inhibition of the epithelial-mesenchymal transition

54 (EMT) by restoring the expression of miR-143-5p and downregulating LAMP3[12]. Additionally, nuclear  
55 enriched abundant transcript 1 (NEAT1) is an lncRNA that has been verified to be a carcinogen in diverse  
56 malignancies, including colorectal cancer, breast cancer, hepatocellular carcinoma, lung cancer, melanoma  
57 cancer, prostate cancer, pancreatic cancer, and ovarian cancer (OC)[13-20].  
58 Furthermore, many studies have demonstrated that abnormal expression patterns of miRNAs serve as  
59 tumor-inhibiting factors and carcinogens in multiple human malignancies, including ESCC[21]. MiR-1299  
60 has been shown to be down-regulated in diverse cancers, including colon cancer, prostate cancer,  
61 hepatocellular carcinoma, and ovarian cancer; furthermore, miR-1299 has also been demonstrated to act as  
62 a tumor suppressor[22-25]. Additionally, matrix metalloproteinase 2 (MMP2) has been identified as an  
63 important gene for invasion and lymph-node metastasis in ESCC, and overexpression of MMP2 protein in  
64 ESCC tissues verifies that it is closely associated with esophageal metastasis[26]. According to the gene  
65 sequences of these aforementioned molecules matched via bioinformatic analysis and literature review, we  
66 hypothesized that lncRNA NEAT1 may influence proliferation, migration, and invasion of ESCC via  
67 regulating miR-1299 and MMP2. Hence, in the current study, we investigated the potential molecular  
68 mechanisms of lncRNA NEAT1 in regulating miR-1299 and MMP2 in ESCC, with the aim of identifying a  
69 novel strategy for ESCC therapy and rehabilitation.

## 70 **Materials and methods**

71 **Main experimental materials.** Normal human esophageal epithelial cells (Het-1A) and human ESCC cell  
72 lines (KYSE30, KYSE150, and EC9706 cells) were all provided by the Shanghai Cell Bank at the Chinese  
73 Academy of Sciences (Shanghai, China). SiRNA lncRNA NEAT1 (si-NEAT1), si-RNA negative controls  
74 (si-NCs), an miR-1299 inhibitors, miR-1299 mimics (miR-1299), and microRNA negative controls (miR-  
75 NCs) were obtained from RiboBio (Guangzhou, China). Lacking 3'-UTR MMP2 overexpression  
76 plasmids (pcDNA-MMP2) were purchased from GenePharma (Shanghai, China).

77 **Patient specimens.** A total of 32 pairs of ESCC tissue and para-cancer tissue samples were obtained from  
78 the First Affiliated Hospital of Zhengzhou University. These patients had not received radiotherapy or  
79 chemotherapy before surgery. Immediately after surgical excision, these tissue specimens were stored  
80 directly in liquid nitrogen until further use. Ethical approval for this study was approved by the Ethics

81 Committee of Zhengzhou University. All procedures were in accordance with the Declaration of Helsinki  
82 and written informed consent was obtained from each patient in advance.

83 **Cell cultures and transfections.** Cells were cultured in RPMI-1640 (Hyclone, Logan, UT, USA)  
84 supplemented with 10% fetal bovine serum (FBS; Gibco, Grand Island, NY, USA) in a humidified  
85 atmosphere at 37°C with 5% (v/v) CO<sub>2</sub>. Si-NEAT1, si-NCs, miR-1299 mimics, miR-NCs, miR-1299  
86 inhibitors, and pcDNA-MMP2 were transfected into KYSE30 and EC9706 cells via Lipofectamine 2000  
87 reagent (Invitrogen, Carlsbad, CA, USA) according to the manufacturer's instructions.

88 **Quantitative real-time PCR (qRT-PCR).** Total RNAs were extracted separately from tissue samples and  
89 cultured cells using TRIzol reagent (Invitrogen, Carlsbad, CA, USA) on the basis of the manufacturer's  
90 protocol. Then, lncRNA NEAT1 and MMP2 mRNA were reversed transcribed into cDNA using  
91 PrimeScript RT Reagent Kit (Takara, Dalian, China), and miR-1299 was reversed transcribed into cDNA  
92 using TaqMan microRNA Reverse Transcription Kit (Invitrogen, Carlsbad, CA, USA). Subsequently, RNA  
93 levels were measured via quantitative real-time qPCR (qRT-PCR) on a Bio-Rad CFX96 Touch System  
94 (Bio-Rad, Hercules, CA, USA). The primers used in this study were synthesized by Tsingke (Tsingke,  
95 Beijing, China) and are listed in Table 1.

96 **Cell counting kit-8 (CCK8) assays.** Cell proliferation was measured by Cell Counting Kit-8 assays  
97 (Dojindo Molecular Laboratories, Japan). Initially, the transfected KYSE30 and EC9706 cells were seeded  
98 in 96-well plates ( $2 \times 10^3$  cells/well) and cultured for several days at 37°C with 5% (v/v) CO<sub>2</sub>. Then, 10  $\mu$ L  
99 of CCK-8 solution was added to the cells and incubated for 1 h at 0, 24, 48, and 72 h. Subsequently, the  
100 optical density (OD) value of each sample at 450 nm was measured by a microplate reader (ELx800;  
101 BioTek, Winooski, VT, USA).

102 **Transwell migration and invasion assays.** Transwell assays were conducted to assess the migration and  
103 invasion of ESCC cells. After transfection, KYSE30 and EC9706 cells ( $1 \times 10^4$  cells/well) were suspended  
104 in serum-free medium and seeded onto the upper chamber of inserted 8- $\mu$ m-pore filters coated with  
105 Matrigel (BD Biosciences, San Jose, CA, USA) for invasion assays or uncoated for migration assays.  
106 RPMI-1640 medium containing 10% FBS was added to the lower chamber. After incubation for 24 h, the  
107 cells having no invasive or migratory activities were erased from the upper surface of the chamber with  
108 cottons swabs and the invaded and migrated cells on the lower surface of the membrane were fixed with

109 4% paraformaldehyde for 30 min, after which they were stained with 0.3% crystal violet for 5 min. Then,  
110 nine regions were randomly selected and the numbers of cells in these regions were counted with an  
111 inverted microscope (Nikon, Tokyo, Japan).

112 **Dual-luciferase reporter assays.** Bioinformatic analyses of miRDB and lncBase v2 were explored to  
113 search and obtain three binding sites of lncRNA NEAT1 and miR-1299. Then, pmirGLO plasmids  
114 containing three pairs of wild-type and mutant binding sequences were purchased from GeneChem  
115 (Shanghai, China), including pmirGLO-Wt1, pmirGLO-Mt1, pmirGLO-Wt2, pmirGLO-Mt2, pmirGLO-  
116 Wt3, and pmirGLO-Mt3. Meanwhile, wild-type and mutant MMP2 3'-UTRs were synthesized and  
117 recombined into pmirGLO Luciferase vectors (Promega, Madison, WI, USA). Then pmirGLO-  
118 Wt/pmirGLO-Mt or miR-1299 mimics/miR-NCs were co-transfected into EC9706/KYSE30 cells. After 48  
119 h of transfection, firefly luciferase activities of cells were measured via dual-luciferase reporter assays  
120 (Promega, Madison, WI, USA).

121 **RNA immunoprecipitation (RIP) assays.** RIP assays were conducted to explore the relationship between  
122 lncRNA NEAT1 and miR-1299 via the Magna RIP RNA-Binding Protein Immunoprecipitation Kit  
123 (Millipore, MA, USA). Initially, digested EC9706 cells were harvested and lysed with complete RIP lysis  
124 buffer. Afterward, the supernatants of cell lysates were incubated with magnetic beads coated with anti-  
125 Ago 2 or control anti-IgG (Millipore, MA, USA) for 4 h at 4°C. Then, the immunoprecipitation complex  
126 was washed six times with cold RIP wash buffer. Finally, the RNA levels of extracted lncRNA NEAT1 and  
127 miR-1299 were detected by qRT-PCR.

128 **Statistical analysis.** GraphPad Prism 5.0 (GraphPad Software, San Diego, USA) and Statistical SPSS 19.0  
129 (IBM, NY, USA) software were used for statistical analysis. All assays were independently repeated three  
130 times under the same conditions. Moreover, all data were reported as the mean  $\pm$  standard deviation (SD).  
131 Linear correlation analysis and independent sample t-tests were used for analysis. A  $P < 0.05$  was  
132 considered to indicate a statistically significant difference.

133

## 134 **Results**

135 **lncRNA NEAT1 is upregulated in ESCC tissues and cell lines.** We measured RNA levels of lncRNA  
136 NEAT1, miR-1299, and MMP2 in 32 ESCC tissues, as well as in multiple ESCC cell lines, via qRT-PCR.

137 The results showed that lncRNA NEAT1 and MMP2 in ESCC tissues were significantly up-regulated  
138 compared with those in para-cancer tissues ( $P<0.05$ ) (Figures 1A, 1C). Meanwhile, miR-1299 in ESCC  
139 tissues was significantly down-regulated ( $P<0.05$ ) (Figure 1B). Analysis of clinicopathological  
140 characteristics indicated that miR-1299 levels in ESCC tissues were not significantly different as a function  
141 of gender, age, lymph-node metastasis status, or and TNM stage. In contrast, lncRNA NEAT1 and MMP2  
142 in ESCC tissues with lymph-node metastasis were significantly higher than those without lymph-node  
143 metastasis ( $P<0.05$ ); additionally, lncRNA NEAT1 and MMP2 in ESCC tissues at the TNM-III stage were  
144 significantly higher than those at stage I or stage II ( $P<0.05$ ) (Table 2). Furthermore, lncRNA NEAT1 and  
145 MMP2 in three ESCC cell lines were significantly upregulated compared with those in normal human  
146 esophageal epithelial cells (Het-1A) ( $P<0.05$ ) (Figures 1D, 1F). Conversely, miR-1299 levels in three  
147 ESCC cell lines were significantly downregulated compared with those in Het-1A cells ( $P<0.05$ ) (Figure  
148 1E). These results suggested that lncRNA NEAT1 and MMP2 were overexpressed in ESCC tissues and  
149 cells, whereas miR-1299 exhibited low expression. Collectively, these findings suggest that up-regulation  
150 of lncRNA NEAT1 was related to the progression of ESCC.

151 **lncRNA NEAT1 silencing impairs ESCC proliferation, invasion, and migration.** KYSE30 and EC9706  
152 cells were used to further investigate the function of lncRNA NEAT1. First, we verified the knockdown  
153 efficiency of lncRNA NEAT1 in KYSE30 and EC9706 cells (Figure 2A). Next, CCK8 assays were  
154 performed in KYSE30 and EC9706 cells. The results indicated that knockdown lncRNA NEAT1  
155 significantly impaired cellular proliferation in KYSE30 and EC9706 cells (Figures 2B, 2C). Additionally,  
156 transwell assays demonstrated that lncRNA NEAT1 knockdown also attenuated invasion and migration of  
157 KYSE30 and EC9706 cells (Figures 2D, 2E). Therefore, these results validated that silencing of lncRNA  
158 NEAT1 inhibited proliferation, invasion, and migration of ESCC.

159 **lncRNA NEAT1 sponges miR-1299 in ESCC cells.** We next explored potential targets of lncRNA  
160 NEAT1 via bioinformatic analysis (LncBase v2 and miRDB), among which miR-1299 was found to have  
161 the highest target score (Figure 3A). Then, to verify the binding level of lncRNA NEAT1 with miR-1299,  
162 dual-luciferase reporter assays and RIP assays were executed with EC9706 cells. The data indicated that  
163 the activity of luciferase was inhibited by miR-1299 in pmirGLO-WT1,2,3 containing three binding sites  
164 (Figures 3B–3D). In addition, lncRNA NEAT1 and miR-1299 in anti-Ago2-immunoprecipitated complexes

165 were significantly enriched compared with those in control anti-IgG-immunoprecipitated complexes  
166 ( $P < 0.05$ ) (Figure 3E), verifying that lncRNA NEAT1 and miR-1299 could simultaneously bind to anti-  
167 Ago2. The above data indicated that lncRNA NEAT1 interacted directly with miR-1299. Subsequently, to  
168 better elucidate the interaction of lncRNA NEAT1 and miR-1299 in ESCC, qRT-PCR assays were  
169 executed with KYSE30 and EC9706 cells. The data revealed that silencing of lncRNA NEAT1 induced up-  
170 regulation of miR-1299 in KYSE30 and EC9706 cells (Figure 3F). Additionally, we found that there was a  
171 significantly negative correlation between lncRNA NEAT1 and miR-1299 levels in ESCC tissues (Figure  
172 3G). Taken together, these findings demonstrated that lncRNA NEAT1 sponges and negatively regulates  
173 miR-1299 as a ceRNA in ESCC cells.

174 **MiR-1299 suppresses invasion and migration by targeting MMP2 in ESCC.** First, we confirmed that  
175 increased miR-1299 negatively regulated the expression of MMP2 at the mRNA level (Figure 4A). Second,  
176 we substantiated the suppressive effect of miR-1299 acting on invasion and migration in KYSE30 and  
177 EC9706 cells. Moreover, we discovered that the suppressive effect of miR-1299 could be reversed by  
178 pcDNA-MMP2 (Figures 4B, 4C). Finally, by performing dual-luciferase reporter assays, we validated that  
179 miR-1299 targeted MMP2 with the predicted binding sites (Figures 4D–4F). In summary, these results  
180 demonstrated that miR-1299 directly targeted MMP2 and weakened its mediated invasion and migration in  
181 KYSE30 and EC9706 cells.

182 **lncRNA NEAT1 silencing suppresses MMP2-mediated invasion by reducing the competitively-**  
183 **binding miR-1299 in ESCC cells.** Next, we investigated whether lncRNA NEAT1 regulated ESCC  
184 invasion by miR-1299/MMP2. Transwell rescue assays were performed with KYSE30 and EC9706 cells.  
185 As shown in Figures 5A and 5B, silencing of lncRNA NEAT1 suppressed invasion in KYSE30 and  
186 EC9706 cells. Meanwhile, miR-1299 inhibitors and pcDNA-MMP2 promoted invasion. The data validated  
187 that miR-1299 inhibitors and pcDNA-MMP2 significantly rescued the invasion of KYSE30 and EC9706  
188 cells following silencing of lncRNA NEAT1 ( $P < 0.05$ ). Thus, our findings elucidated that silencing of  
189 lncRNA NEAT1 reduced the competitively-binding miR-1299 to inhibit MMP2-mediated invasion in  
190 ESCC cells.

191

192 **Discussion**

193 Many studies have demonstrated that lncRNAs perform crucial roles in the progression of malignant  
194 tumors and may also represent novel targets for oncotherapy[27]. Therefore, the current study was  
195 performed to investigate the function of lncRNA NEAT1 in ESCC. We found that lncRNA NEAT1 was  
196 highly expressed in ESCC tissue samples and served as a ceRNA via sponging miR-1299 to upregulate  
197 MMP2, which ultimately promoted the progression of ESCC.

198 Initially, in our present study, we discovered the lncRNA NEAT1 was upregulated in 32 ESCC tissue  
199 samples and in three different cell lines. Furthermore, the expression level of lncRNA NEAT1 was closely  
200 associated with lymph-node metastasis and clinical stage. Additionally, silencing of lncRNA NEAT1  
201 suppressed cell proliferation, invasion, and migration, consistent with previous research.[28] Moreover, we  
202 found that lncRNA NEAT1 sponged and inhibited miR-1299. Recently, lncRNAs have been confirmed to  
203 serve as ceRNAs via interacting with miRNA seed sequences[9, 10, 12]. For instance, lncRNA MEG3  
204 participates in the inhibition of cell proliferation and invasion by serving as a ceRNA to regulate the  
205 expression of FOXO1 and E-cadherin via competitively binding miR-9 in ESCC[29]. In addition, lncRNA  
206 HOTAIR promotes the progression of EMT by acting as a ceRNA to regulate ZEB1 expression through the  
207 sponging of miR-130a-5p in ESCC[30]. Therefore, we hypothesized that lncRNA NEAT1 might  
208 competitively bind specific miRNAs to exert the inhibitory effects in ESCC. To test this hypothesis, we  
209 searched for potential miRNAs interacting with lncRNA NEAT1 through miRDB and LncBase v2. We  
210 ultimately identified that miR-1299 had the highest target score with lncRNA NEAT1 and exhibited  
211 binding to three sites simultaneously. Moreover, qRT-PCR assays suggested that the expression of miR-  
212 1299 was negatively correlated with that of lncRNA NEAT1 in ESCC cells and tissue samples.

213 Furthermore, based on dual-luciferase reporter assays and RIP assays, we verified that miR-1299 was a  
214 direct target of lncRNA NEAT1 and possessed three binding regions. Interestingly, miR-1299 has been  
215 confirmed to be a tumor-inhibiting factor[21-25].Collectively, these results demonstrate that lncRNA  
216 NEAT1 acted as a ceRNA to enhance cell proliferation, invasion, and migration by sponging miR-1299 in  
217 ESCC.

218 Subsequently, we found that miR-1299 overexpression reduced the expression of MMP2 mRNA. Previous  
219 studies have shown that miR-1299 inhibits the progression of diverse human tumors by targeting mRNAs  
220 for molecular proteins[25, 31]. For example, miR-1299 inhibits the growth, invasion, and metastasis of



221 prostate cancer via regulating NEK2[22]. Inhibition of miR-1299 expression increases the proliferation,  
222 cell-cycle progression, and invasion of HCC cells by promoting CTNND1 expression[32]. In the current  
223 study, we found that miR-1299 negatively regulated MMP2 expression and the pcDNA-MMP2 weakened  
224 the ability of miR-1299 to inhibit invasion and migration in KYSE30 and EC9706 cells, suggesting that  
225 miR-1299 was involved in MMP2-mediated invasion and migration. Furthermore, bioinformatics and dual-  
226 luciferase assays confirmed that MMP2 was a direct target of miR-1299 in ESCC cells. Finally, we found  
227 that silencing of lncRNA NEAT1 also inhibited MMP2-mediated invasion by reducing the competitively  
228 binding miR-1299 in KYSE30 and EC9706 cells. By matching the seed sequences of lncRNA NEAT1 and  
229 MMP2 binding with miR-1299, we discovered that lncRNA NEAT1 and MMP2 shared the same base  
230 sequences for miR-1299. Moreover, based on transwell rescue assays, si-NEAT1 suppressed invasion,  
231 whereas miR-1299 inhibitors and pcDNA-MMP2 markedly reversed the suppressive effect of silencing  
232 lncRNA NEAT1 in KYSE30 and EC9706 cells. These results indicate that there is an ESCC-specific  
233 ceRNA network based on expression profiles of lncRNAs, miRNAs, and mRNAs[33]. Furthermore, similar  
234 ceRNA networks have been elucidated in numerous previous studies[10,12,14,16]. Collectively, these  
235 results strongly suggest that the suppressed effect of lncRNA NEAT1 silencing on MMP2 in our present  
236 study was accomplished via the miR-1299 pathway.

237 In conclusion, we found that lncRNA NEAT1 was overexpressed in ESCC tissues and cells, and was  
238 associated with lymph-node metastasis and TNM stage. Silencing of lncRNA NEAT1 inhibited ESCC  
239 proliferation, invasion, and migration via reducing the competitively-binding miR-1299 and enhancing  
240 miR-1299-targeted suppression of MMP2. Our present findings provide novel evidence that lncRNAs  
241 function as ceRNAs of miRNAs, and that lncRNA NEAT1 may represent a promising target for ESCC  
242 therapy and rehabilitation.

243 **Acknowledgments.** Not applicable.

244

## 245 **References**

- 246 [1] Domper Arnal M J, Ferrández Arenas Á, Lanas Arbeloa, Á. Esophageal cancer: Risk factors,  
247 screening and endoscopic treatment in Western and Eastern countries. *World J Gastroenterol* 2015;  
248 21: 7933–7943. <https://doi.org/10.3748/wjg.v21.i26.7933>
- 249 [2] Bray F, Ferlay J, Soerjomataram I, Siegel R L, Torre L A et al. Global cancer statistics 2018:  
250 GLOBOCAN estimates of incidence and mortality worldwide for 36 cancers in 185 countries. *CA*

- 251 Cancer J Clin 2018; 68: 394-424. <https://doi.org/10.3322/caac.21492>
- 252 [3] Rustgi A K, El-Serag H B. Esophageal carcinoma. *N Engl J Med* 2014; 371: 2499-2509.  
253 <https://doi.org/10.1056/NEJMra1314530>
- 254 [4] Li DJ, Shi M, Wang Z. RUNX3 reverses cisplatin resistance in esophageal squamous cell carcinoma  
255 via suppression of the protein kinase B pathway. *Thorac Cancer* 2016; 7: 570-580.  
256 <https://doi.org/10.1111/1759-7714.12370>
- 257 [5] Huang FL, Yu SJ. Esophageal cancer: Risk factors, genetic association, and treatment. *Asian J Surg*  
258 2018; 41: 210-215. <https://doi.org/10.1016/j.asjsur.2016.10.005>
- 259 [6] Spizzo R, Almeida MI, Colombatti A, Calin GA. Long non-coding RNAs and cancer: a new frontier  
260 of translational research?. *Oncogene* 2012; 31:4577-4587. <https://doi.org/10.1038/onc.2011.621>
- 261 [7] Li Y, Shi X, Yang W, Lu Z, Wang P et al. Transcriptome profiling of lncRNA and co-expression  
262 networks in esophageal squamous cell carcinoma by RNA sequencing. *Tumour Biol* 2016; 37:  
263 13091-13100. <https://doi.org/10.1007/s13277-016-5227-3>
- 264 [8] Rashid F, Shah A, Shan G. Long Non-coding RNAs in the Cytoplasm. *Genomics Proteomics*  
265 *Bioinformatics* 2016; 14: 73-80. <https://doi.org/10.1016/j.gpb.2016.03.005>
- 266 [9] Li Z, Qin X, Bian W, Li Y, Shan B et al. Exosomal lncRNA ZFAS1 regulates esophageal squamous  
267 cell carcinoma cell proliferation, invasion, migration and apoptosis via microRNA-124/STAT3 axis.  
268 *J Exp Clin Cancer Res* 2019; 38: 477. <https://doi.org/10.1186/s13046-019-1473-8>
- 269 [10] Liu JQ, Deng M, Xue NN, Li TX, Guo YX et al. lncRNA KLF3-AS1 Suppresses Cell Migration  
270 and Invasion in ESCC by Impairing miR-185-5p-Targeted KLF3 Inhibition. *Mol Ther Nucleic*  
271 *Acids* 2020; 20: 231-241. <https://doi.org/10.1016/j.omtn.2020.01.020>
- 272 [11] Shi W, Wang Q, Bian Y, Fan Y, Zhou Y et al. Long noncoding RNA PANDA promotes esophageal  
273 squamous carcinoma cell progress by dissociating from NF-YA but interact with SAFA. *Pathol Res*  
274 *Pract* 2019; 215: 152604. <https://doi.org/10.1016/j.prp.2019.152604>
- 275 [12] Yang C, Shen S, Zheng X, Ye K, Sun Y et al. Long noncoding RNA HAGLR acts as a microRNA-  
276 143-5p sponge to regulate epithelial-mesenchymal transition and metastatic potential in esophageal  
277 cancer by regulating LAMP3. *FASEB J* 2019; 33: 10490-10504.  
278 <https://doi.org/10.1096/fj.201802543RR>
- 279 [13] Pang Y, Wu J, Li X, Wang C, Wang M et al. NEAT1/miR-124/STAT3 feedback loop promotes  
280 breast cancer progression. *Int J Oncol* 2019; 55: 745-754. <https://doi.org/10.3892/ijo.2019.4841>
- 281 [14] Liu H, Li A, Sun Z, Zhang J, Xu H. Long non-coding RNA NEAT1 promotes colorectal cancer  
282 progression by regulating miR-205-5p/VEGFA axis. *Hum Cell* 2020; 33: 386-396.  
283 <https://doi.org/10.1007/s13577-019-00301-0>
- 284 [15] Ding F, Lai J, Gao Y, Wang G, Shang J et al. NEAT1/miR-23a-3p/KLF3: a novel regulatory axis in  
285 melanoma cancer progression. *Cancer Cell Int* 2019; 19: 217. <https://doi.org/10.1186/s12935-019-0927-6>
- 286
- 287 [16] Yu PF, Wang Y, Lv W, Kou D, Hu HL et al. lncRNA NEAT1/miR-1224/KLF3 contributes to cell

- 288 proliferation, apoptosis and invasion in lung cancer. *Eur Rev Med Pharmacol Sci* 2019; 23: 8403-  
289 8410. [https://doi.org/10.26355/eurev\\_201910\\_19151](https://doi.org/10.26355/eurev_201910_19151)
- 290 [17] Guo Z, He C, Yang F, Qin L, Lu X et al. Long non-coding RNA-NEAT1, a sponge for miR-98-5p,  
291 promotes expression of oncogene HMGA2 in prostate cancer. *Biosci Rep* 2019; 39: BSR20190635.  
292 <https://doi.org/10.1042/BSR20190635>
- 293 [18] Zhou X, Wang X, Zhou Y, Cheng L, Zhang Y et al. Long Noncoding RNA NEAT1 Promotes Cell  
294 Proliferation And Invasion And Suppresses Apoptosis In Hepatocellular Carcinoma By Regulating  
295 miRNA-22-3p/akt2 In Vitro And In Vivo. *Onco Targets Ther* 2019; 12: 8991-9004.  
296 <https://doi.org/10.2147/OTT.S224521>
- 297 [19] Feng Y, Gao L, Cui G, Cao Y. LncRNA NEAT1 facilitates pancreatic cancer growth and metastasis  
298 through stabilizing ELF3 mRNA. *Am J Cancer Res* 2020; 10: 237-248.
- 299 [20] Liu Y, Wang Y, Fu X, Lu Z. Long non-coding RNA NEAT1 promoted ovarian cancer cells'  
300 metastasis through regulation of miR-382-3p/ROCK1 axial. *Cancer Sci* 2018; 109: 2188-2198.  
301 <https://doi.org/10.1111/cas.13647>
- 302 [21] Khan AQ, Ahmed EI, Elareer NR, Junejo K, Steinhoff M et al. Role of miRNA-Regulated Cancer  
303 Stem Cells in the Pathogenesis of Human Malignancies. *Cells* 2019; 8: 840.  
304 <https://doi.org/10.3390/cells8080840>
- 305 [22] Zhang FB, Du Y, Tian Y, Ji ZG, Yang PQ. MiR-1299 functions as a tumor suppressor to inhibit the  
306 proliferation and metastasis of prostate cancer by targeting NEK2. *Eur Rev Med Pharmacol Sci*  
307 2019; 23: 530-538. [https://doi.org/10.26355/eurev\\_201901\\_16865](https://doi.org/10.26355/eurev_201901_16865)
- 308 [23] Wang Y, Lu Z, Wang N, Zhang M, Zeng X et al. MicroRNA-1299 is a negative regulator of STAT3  
309 in colon cancer. *Oncol Rep* 2017; 37: 3227-3234. <https://doi.org/10.3892/or.2017.5605>
- 310 [24] Pei Y, Li K, Lou X, Wu Y, Dong X et al. miR-1299/NOTCH3/TUG1 feedback loop contributes to  
311 the malignant proliferation of ovarian cancer. *Oncol Rep* 2020; 44: 438-448.  
312 <https://doi.org/10.3892/or.2020.7623>
- 313 [25] Zhu H, Wang G, Zhou X, Song X, Gao H et al. miR-1299 suppresses cell proliferation of  
314 hepatocellular carcinoma (HCC) by targeting CDK6. *Biomed Pharmacother* 2016; 83: 792-797.  
315 <https://doi.org/10.1016/j.biopha.2016.07.037>
- 316 [26] Groblewska M, Siewko M, Mroczo B, Szmitkowski M. The role of matrix metalloproteinases  
317 (MMPs) and their inhibitors (TIMPs) in the development of esophageal cancer. *Folia Histochem*  
318 *Cytobiol* 2012; 50: 12-19. <https://doi.org/10.2478/18691>
- 319 [27] Li FZ, Zang WQ. Knockdown of lncRNAXLOC\_001659 inhibits proliferation and invasion of  
320 esophageal squamous cell carcinoma cells. *World J Gastroenterol* 2019; 25: 6299-6310.  
321 <https://doi.org/10.3748/wjg.v25.i42.6299>
- 322 [28] Chen X, Kong J, Ma Z, Gao S, Feng X. Up regulation of the long non-coding RNA NEAT1  
323 promotes esophageal squamous cell carcinoma cell progression and correlates with poor prognosis.  
324 *Am J Cancer Res* 2015; 5: 2808-2815.

- 325 [29] Dong Z, Zhang A, Liu S, Lu F, Guo Y et al. Aberrant Methylation-Mediated Silencing of lncRNA  
326 MEG3 Functions as a ceRNA in Esophageal Cancer. *Mol Cancer Res* 2017; 15: 800-810.  
327 <https://doi.org/10.1158/1541-7786.MCR-16-0385>
- 328 [30] Wang W, Wu D, He X, Hu X, Hu C et al. CCL18-induced HOTAIR upregulation promotes  
329 malignant progression in esophageal squamous cell carcinoma through the miR-130a-5p-ZEB1  
330 axis. *Cancer Lett* 2019; 460: 18-28. <https://doi.org/10.1016/j.canlet.2019.06.009>
- 331 [31] Xiao Z, Wang Z, Hu B, Mao Z, Zhu D et al. MiR-1299 promotes the synthesis and secretion of  
332 prolactin by inhibiting FOXO1 expression in drug-resistant prolactinomas. *Biochem Biophys Res*  
333 *Commun* 2019; 520: 79-85. <https://doi.org/10.1016/j.bbrc.2019.09.070>
- 334 [32] Yu X, Sheng P, Sun J, Zhao X, Zhang J et al. The circular RNA circMAST1 promotes  
335 hepatocellular carcinoma cell proliferation and migration by sponging miR-1299 and regulating  
336 CTNND1 expression. *Cell Death Dis* 2020; 11: 340. <https://doi.org/10.1038/s41419-020-2532-y>
- 337 [33] Xue WH, Fan ZR, Li LF, Lu JL, Ma BJ et al. Construction of an oesophageal cancer-specific  
338 ceRNA network based on miRNA, lncRNA, and mRNA expression data. *World J Gastroenterol*  
339 2018; 24: 23-34. <https://doi.org/10.3748/wjg.v24.i1.23>

340

#### 341 **Figure Legends**

342 **Figure 1.** lncRNA NEAT1 is upregulated in ESCC tissues and cells. A) The expression levels of lncRNA  
343 NEAT1 in 32 ESCC tissues and their para-carcinoma tissues were analyzed by qRT-PCR. B) The  
344 expression levels of miR-1299 in 32 ESCC tissues and their para-carcinoma tissues were analyzed by qRT-  
345 PCR. C) The expression levels of MMP2 mRNA in 32 ESCC tissues and their para-carcinoma tissues were  
346 analyzed by qRT-PCR. D) Relative expression levels of lncRNA NEAT1 in Het-1A cells and ESCC cells  
347 were measured by qRT-PCR. E) Relative expression levels of miR-1299 in Het-1A cells and ESCC cells  
348 were measured by qRT-PCR. F) Relative expression levels of MMP2 mRNA in Het-1A cells and ESCC  
349 cells were measured by qRT-PCR. \*P<0.05

350

351 **Figure 2.** lncRNA NEAT1 silencing impairs ESCC proliferation, invasion, and migration. A) Relative  
352 expression levels of lncRNA NEAT1 in KYSE30 and EC9706 cells transfected with si-NC, or si-NEAT1.  
353 B) CCK8 assays revealed that si-NEAT1 impaired the proliferation in KYSE30 cells. C) CCK8 assays  
354 revealed that si-NEAT1 impaired the proliferation in EC9706 cells. D) Transwell assays of cell invasion  
355 revealed that lncRNA NEAT1 knockdown impaired invasion of KYSE30 and EC9706 cells. E) Transwell  
356 assays of cell migration revealed that lncRNA NEAT1 knockdown impaired migration of KYSE30 and

357 EC9706 cells. \*P<0.05

358

359 **Figure 3.** lncRNA NEAT1 sponges and negatively regulates miR-1299 in ESCC cells. A) Chart showing  
360 three inferred binding sites of lncRNA NEAT1 with miR-1299. The regions marked with an underscore  
361 were the mutated sites in lncRNA NEAT1. B) Dual-luciferase reporter assays were executed with EC9706  
362 cells and showed that the activity of luciferase was inhibited by miR-1299 in pmirGLO-Wt1. C) Dual-  
363 luciferase reporter assays showed that the activity of luciferase was inhibited by miR-1299 in pmirGLO-  
364 Wt2. D) Dual-luciferase reporter assays showed that the activity of luciferase was inhibited by miR-1299 in  
365 pmirGLO-Wt3. E) RIP assays were executed with EC9706 cells and showed that lncRNA NEAT1 and  
366 miR-1299 in anti-Ago2-immunoprecipitations were enhanced compared with those in control anti-IgG-  
367 immunoprecipitations. F) Silencing of lncRNA NEAT1 promoted miR-1299 expression in KYSE30 and  
368 EC9706 cells. G) A significant negative linear correlation was found between lncRNA NEAT1 levels and  
369 miR-1299 levels in ESCC tissues. \*P<0.05

370

371 **Figure 4.** MiR-1299 weakens invasion and migration through targeting MMP2 in ESCC. A) The  
372 expression levels of MMP2 mRNA in KYSE30 and EC9706 cells transfected with miR-NC and miR-1299  
373 mimics were analyzed by qRT-PCR. B) Transwell assays of cell invasion in KYSE30 and EC9706 cells  
374 transfected with miR-NC, miR-1299 mimics, pcDNA-MMP2, and miR-1299 mimics+pcDNA-MMP2. C)  
375 Transwell assays of cell migration in KYSE30 and EC9706 cells transfected with miR-NC, miR-1299  
376 mimics, pcDNA-MMP2, and miR-1299 mimics+pcDNA-MMP2. D) Chart of predicted miR-1299 binding  
377 sites of MMP2 3'-UTR. E) MiR-1299 inhibited the activity of luciferase in KYSE30 cells co-transfected  
378 with pmirGLO-Wt-MMP2 3'-UTR. F) MiR-1299 inhibited the activity of luciferase in EC9706 cells co-  
379 transfected with pmirGLO-Wt-MMP2 3'-UTR. \*P<0.05

380

381 **Figure 5.** lncRNA NEAT1 silencing suppresses MMP2-mediated invasion by reducing the competitively-  
382 binding miR-1299 in ESCC cells. A) Transwell rescue assays of cell invasion in KYSE30 cells transfected  
383 with si-NEAT1, miR-1299 inhibitor, si-NEAT1+miR-1299 inhibitor, pcDNA-MMP2, and si-  
384 NEAT1+pcDNA-MMP2. B) Transwell rescue assays of cell invasion in EC9706 cells transfected with si-

385 NEAT1, miR-1299 inhibitor, si-NEAT1+miR-1299 inhibitor, pcDNA-MMP2, and si-NEAT1+pcDNA-  
 386 MMP2. \*P<0.05

387

388 **Table 1.** Primer sequences used for qRT-PCR

| Gene         | Forward (5'-3')         | Reverse (5'-3')         |
|--------------|-------------------------|-------------------------|
| lncRNA NEAT1 | TGGCTAGCTCAGGGCTTCAG    | TCTCCTTGCCAAGCTTCCTTC   |
| miR-1299     | CCCTAACGGTTCTGGAATTCTGT | TATGGTTGTTACGACTCCTTCAC |
| GADPH        | TGAACGGGAAGCTCACTGG     | TCCACCACCCTGTTGCTGTA    |
| U6           | CTCGCTTCGGCAGCACA       | AACGCTTCACGAATTTGCGT    |
| MMP2         | GGAACGCCGATGGGGAGTA     | CCTGGAAGCGGAATGGAAA     |

389

390 **Table 2.** Clinicopathologic characteristics and lncRNA NEAT1, MiR-1299, and MMP2 levels in 32 ESCC  
 391 samples

| Characteristics              | lncRNA NEAT1 levels | P-value | miR-1299 levels | P-value | MMP2 levels | P-value |
|------------------------------|---------------------|---------|-----------------|---------|-------------|---------|
| <b>Gender</b>                |                     |         |                 |         |             |         |
| Female                       | 2.31±1.35           | 0.592   | 0.61±0.32       | 0.651   | 2.06±0.46   | 0.097   |
| Male                         | 2.56±1.26           |         | 0.66±0.37       |         | 2.33±0.43   |         |
| <b>Age</b>                   |                     |         |                 |         |             |         |
| ≤60                          | 2.61±1.19           | 0.500   | 0.69±0.38       | 0.382   | 2.15±0.43   | 0.562   |
| >60                          | 2.29±1.39           |         | 0.59±0.31       |         | 2.25±0.49   |         |
| <b>TNM Stage</b>             |                     |         |                 |         |             |         |
| I + II                       | 1.97±1.18           | 0.016*  | 0.70±0.35       | 0.233   | 2.02±0.38   | 0.008*  |
| III                          | 3.05±1.20           |         | 0.55±0.32       |         | 2.44±0.45   |         |
| <b>Lymph-Node Metastasis</b> |                     |         |                 |         |             |         |
| Absence                      | 1.89±1.17           | 0.013*  | 0.67±0.34       | 0.548   | 1.97±0.40   | 0.002*  |
| Presence                     | 2.99±1.19           |         | 0.60±0.35       |         | 2.44±0.39   |         |

392 \*P<0.05

**A**Relative expression  
of LncRNA NEAT1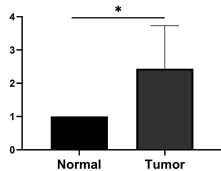**B**Relative expression  
of miR-1299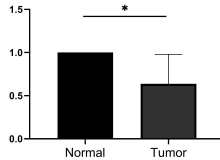**C**Relative expression  
of MMP2 mRNA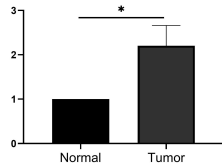**D**Relative expression  
of LncRNA NEAT1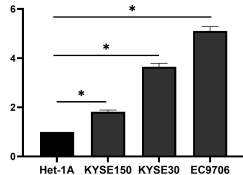**E**Relative expression  
of miR-1299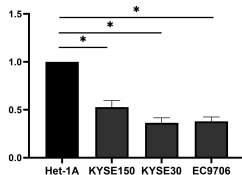**F**Relative expression  
of MMP2 mRNA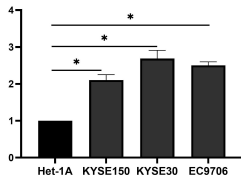

**A**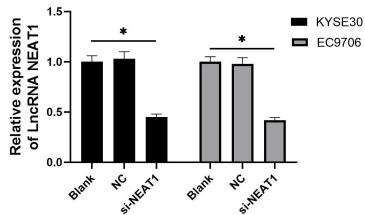**B**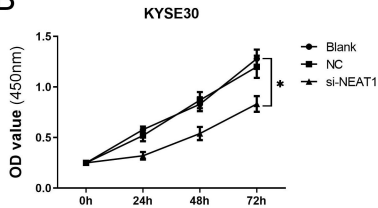**C**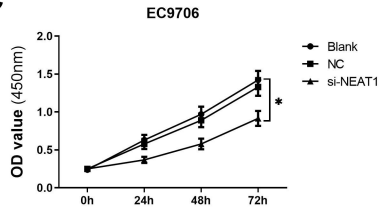**D**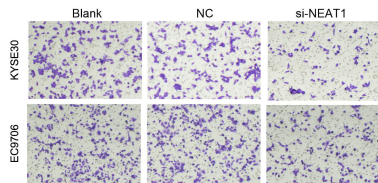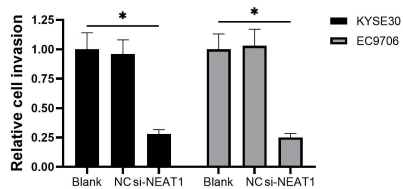**E**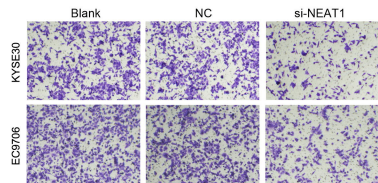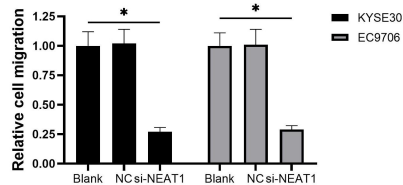



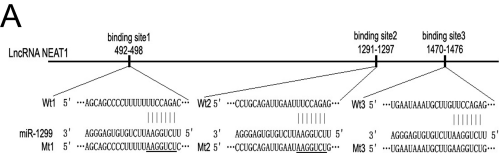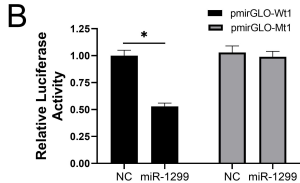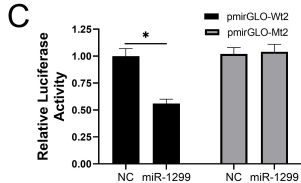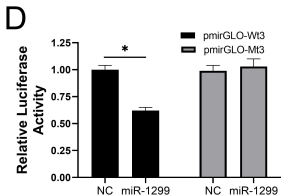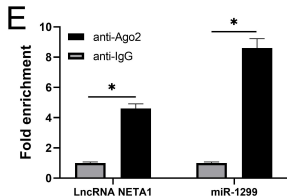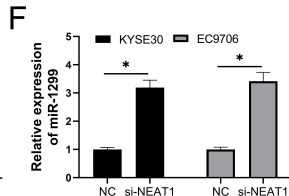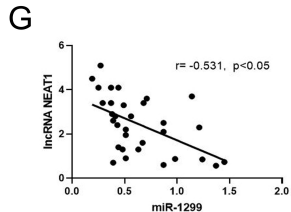

**A**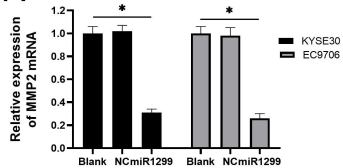**B**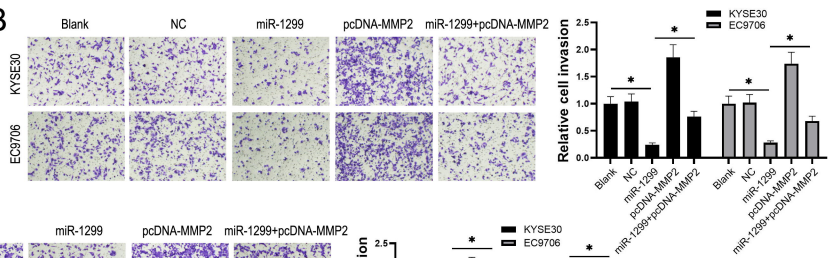**C**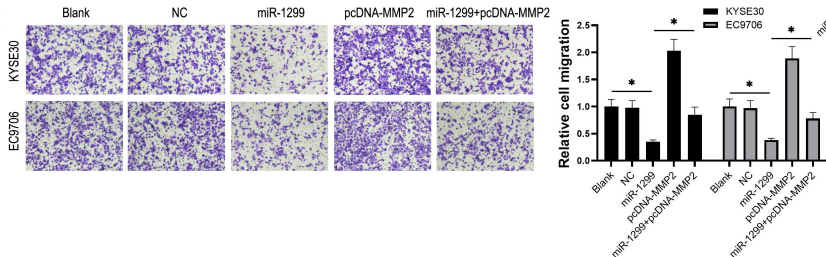**D**

Wt MMP2 3'UTR 5' ... CCUGGUAUUUUAAGAUAUCCAGAG ...  
 miR-1299 3' AGGGAGUGUGUCUAAGGUCUU  
 Mt MMP2 3'UTR 5' ... CCUGGUAUUUUAAGAAAGGUCAG ...

**E**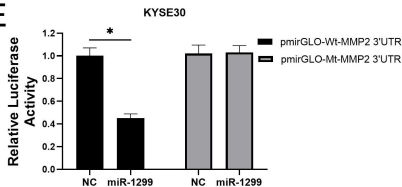**F**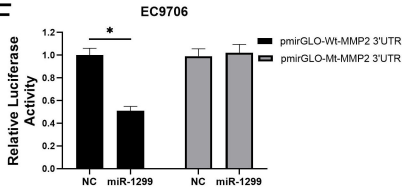

**A**

KYSE30

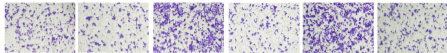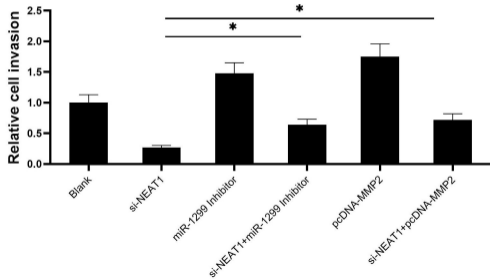**B**

EC9706

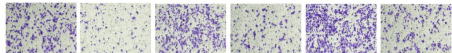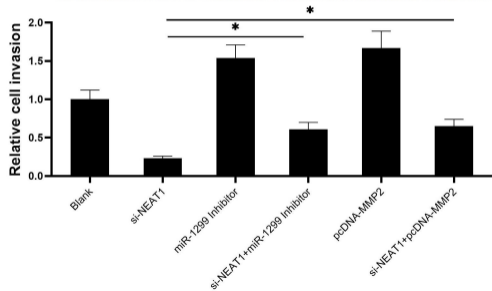

Source: https://www.biorxiv.org/content/10.1101/2021.01.19.427233.full.pdf
